# Supplementary material for: Computational formulation study of insulin on biodegradable polymers
Source: Royal Society of Chemistry journal article supplement (doi:10.1039/d3ra02845c), 2023-01-01
Supplement: d3ra02845c1.pdf [file d3ra02845c1.pdf]

**Supplementary Data:**

**Figure 1:** Quantum mechanical optimized monomeric polymers showcasing electropositive(blue) and electronegative potentials(red) A) Chitosan B) Pectin C) Cyclodextrin D) Alginate E) Dextrin

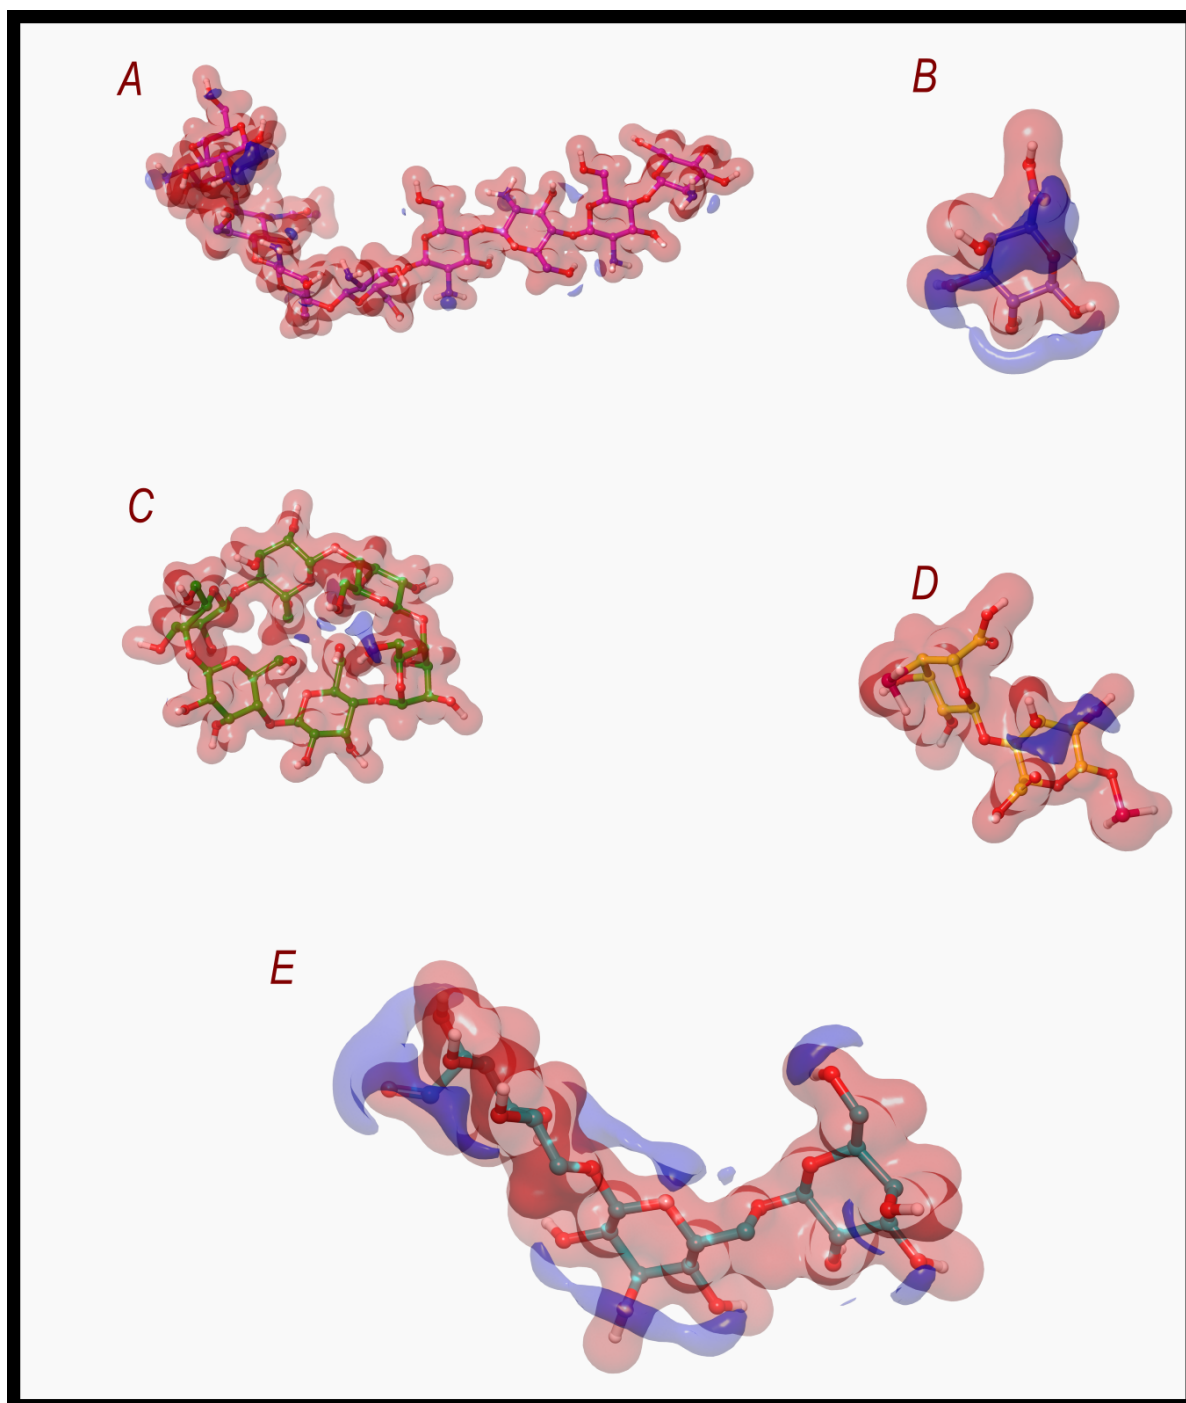

**Figure 2: Root mean square deviations of Replica Runs of molecular dynamics calculations at 280 K**

:

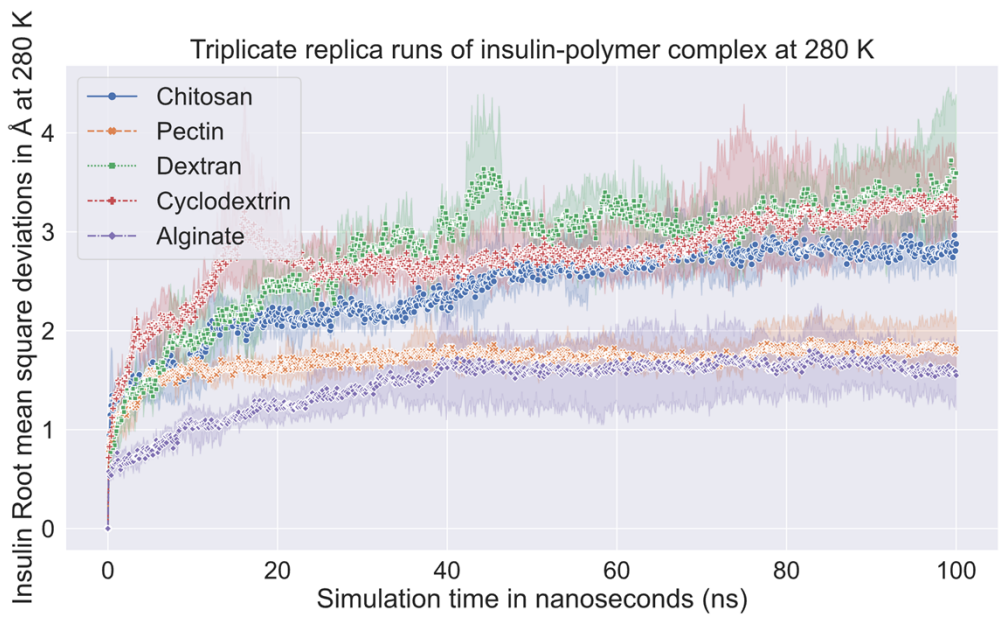

**Figure 3: Root mean square deviations of Replica Runs of molecular dynamics calculations at 280 K**

:

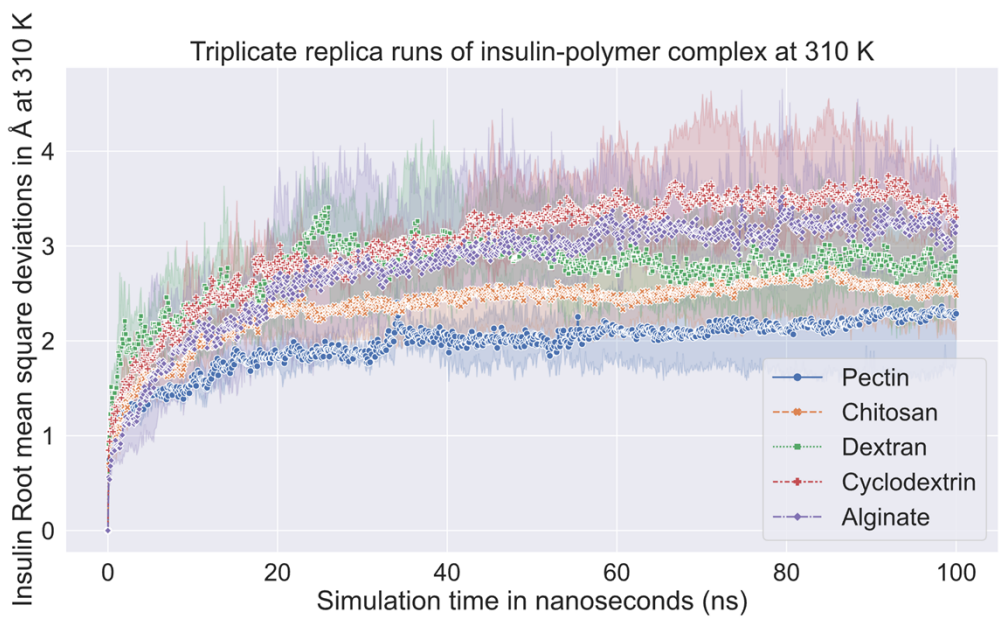

**Figure 4 : Principal Component Analysis of computational formulation at 280K and 310 K:**

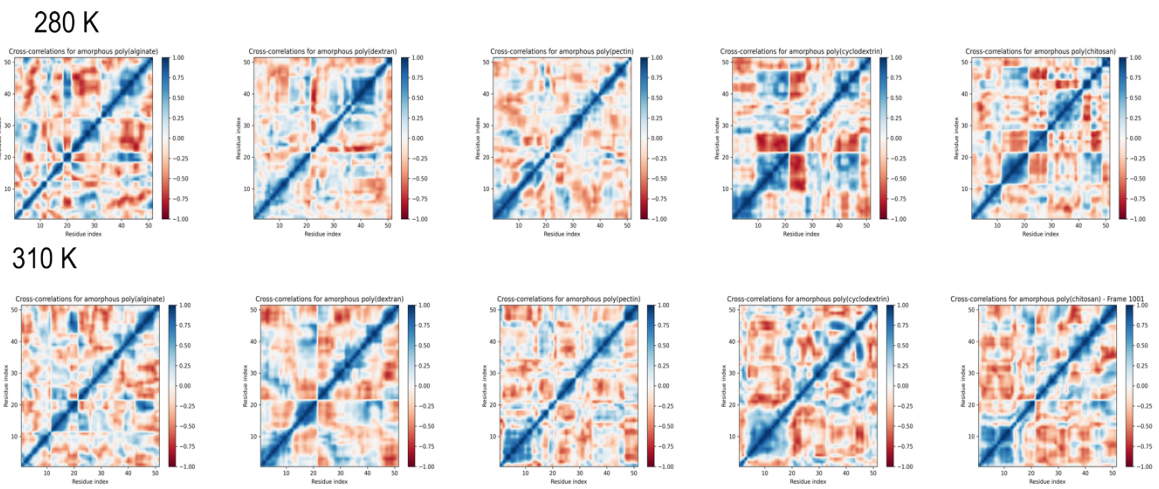

**Figure 5: 280 K Cyclodextrin-insulin energetics analysis.**

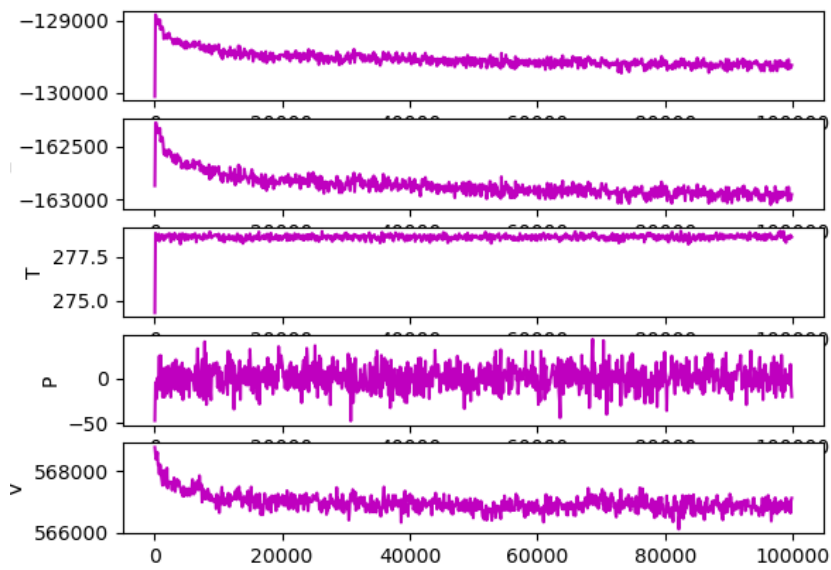

**Figure 6 280 K Dextran – insulin formulation energetics analysis.**

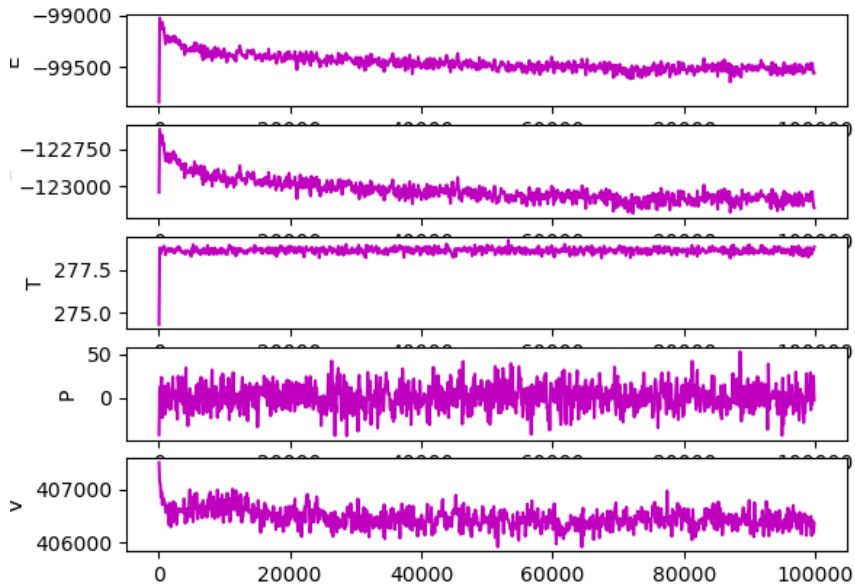

**Figure 7 : 280 K Pectin – insulin formulation energetics analysis.**

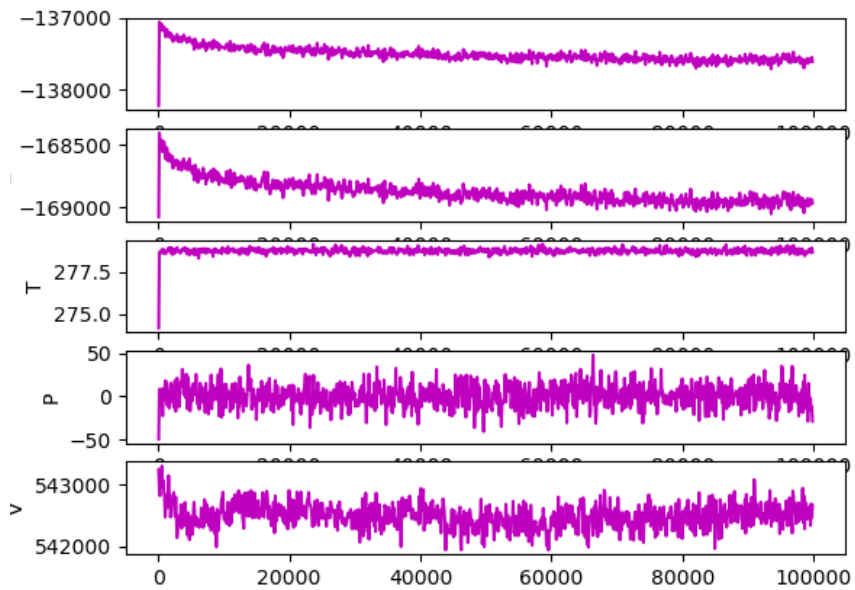

Figure 8 : 280 K Alginate- insulin formulation energetics analysis.

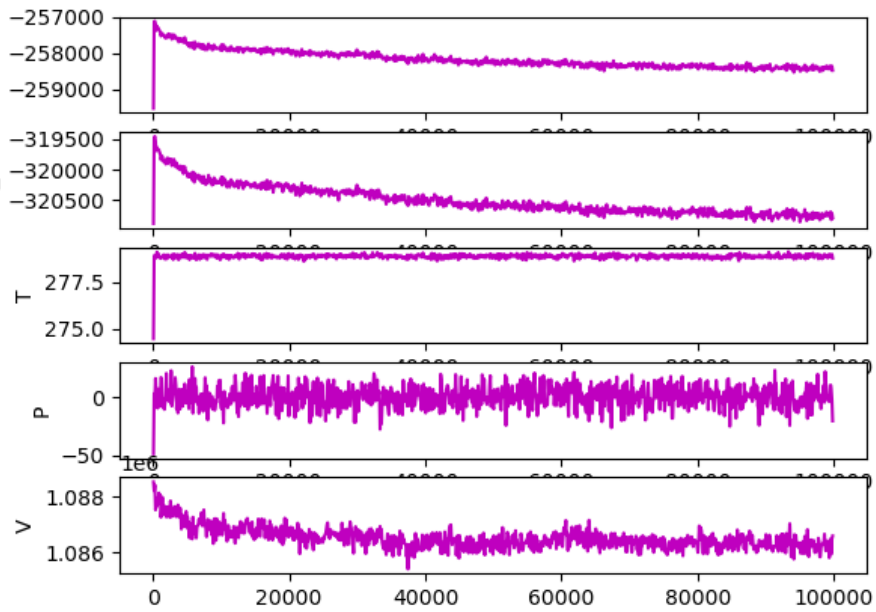

Figure 9: 280 K Chitosan – insulin formulation energetics analysis.

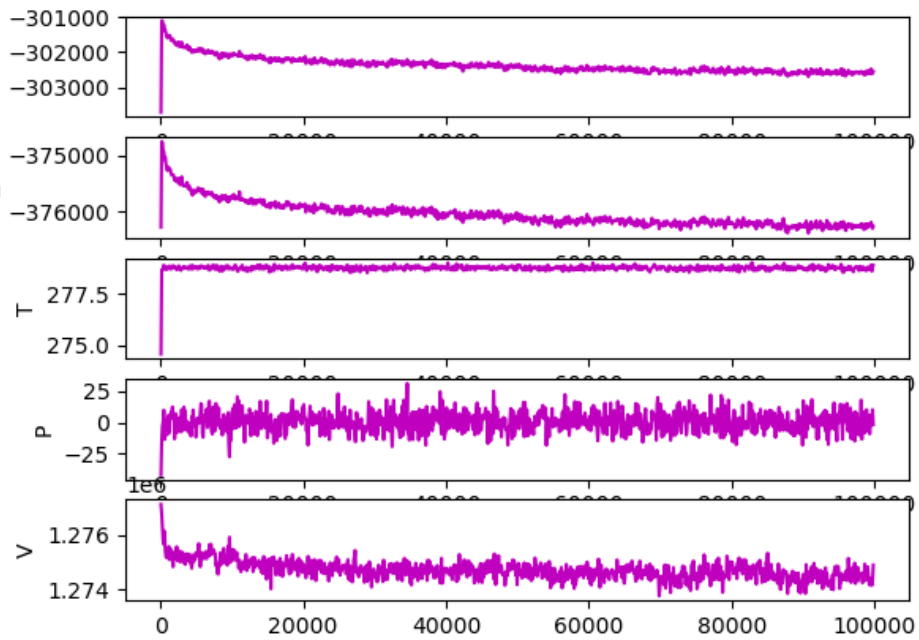

Figure 10: 310 K Cyclodextrin-insulin energetics analysis.

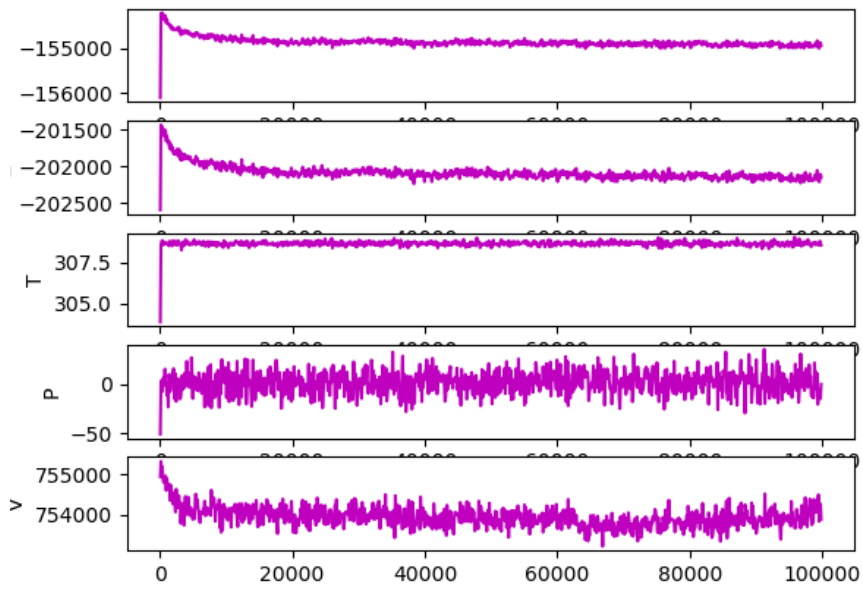

Figure 11 310 K Dextran – insulin formulation energetics analysis.

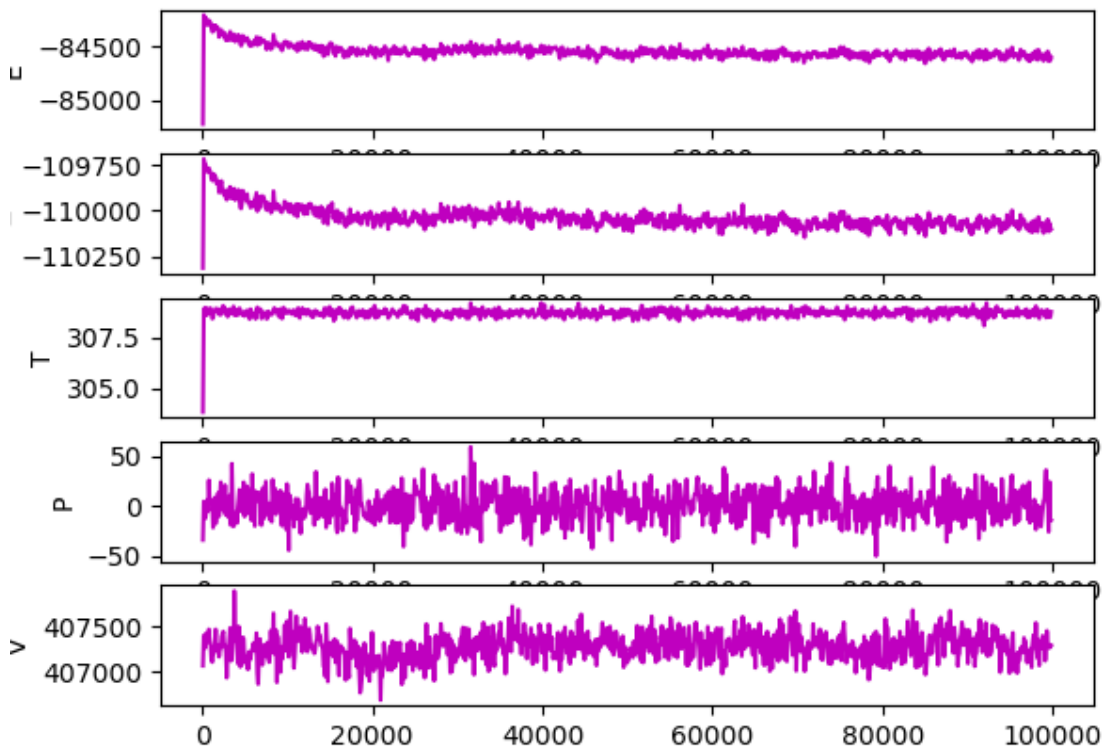

Figure 12 310 K Pectin – insulin formulation energetics analysis.

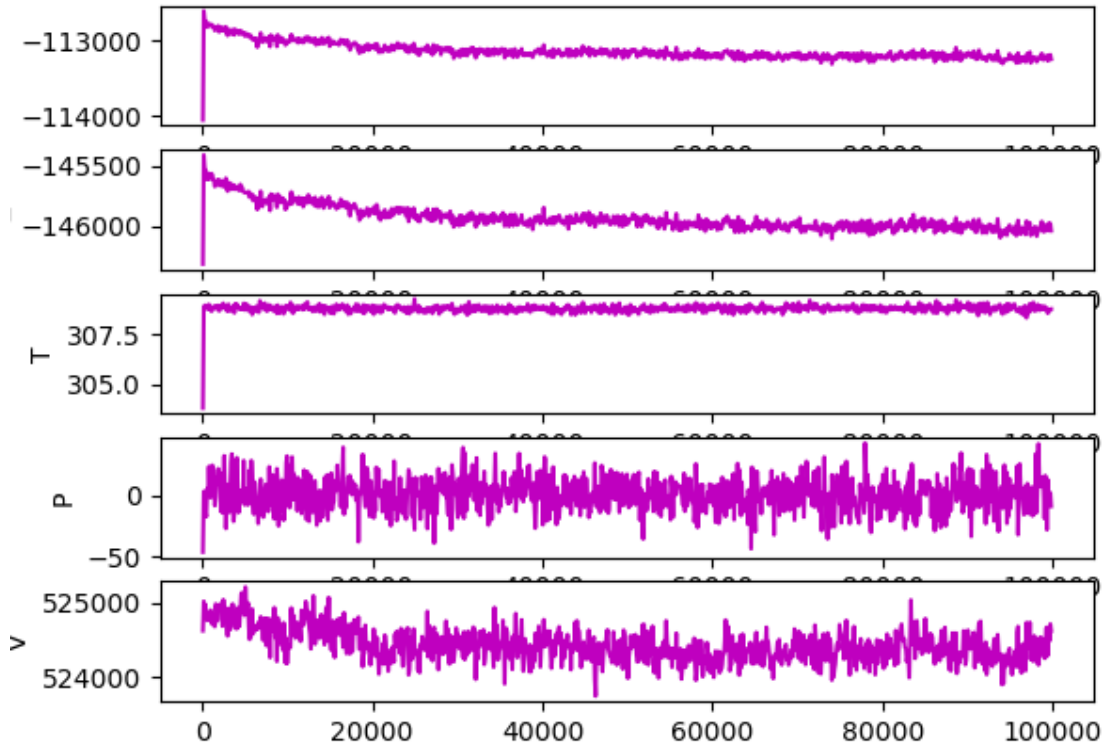

Figure 13: 310 Alginate- insulin formulation energetics analysis.

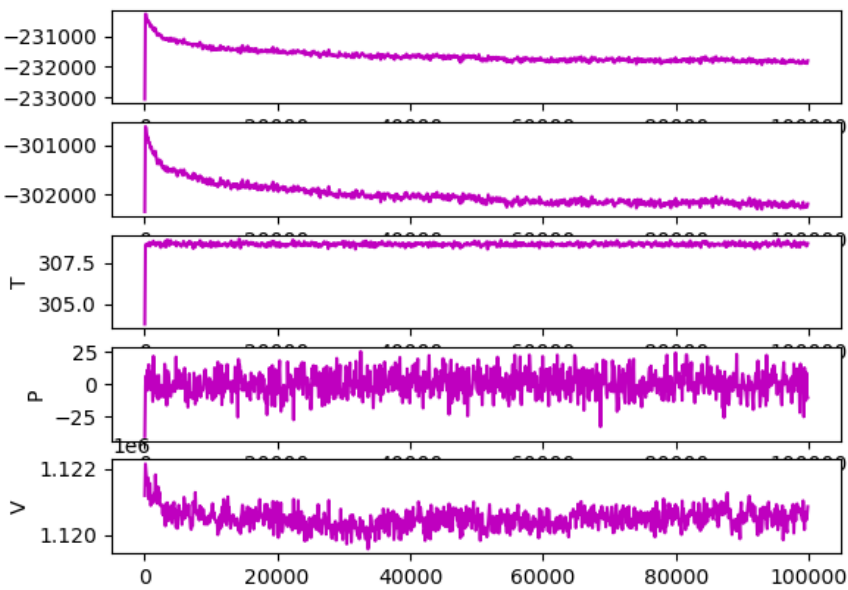



Figure 14 310 K Chitosan – insulin formulation energetics analysis.

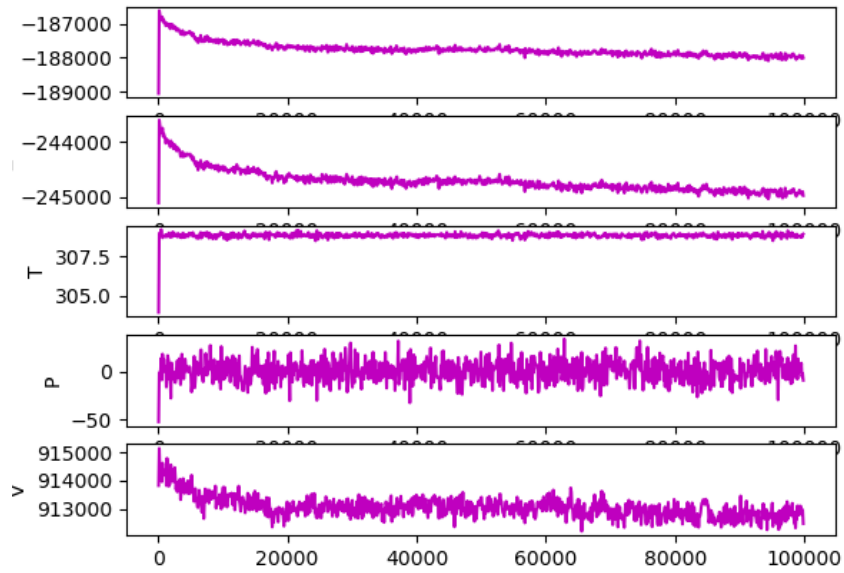



**Tables:**

**Table 1: Quantum mechanical properties of monomer polymer units:**

| S.No | Polymer      | QM Method     | QM Basis | Number of canonical orbitals | Gas Phase Energy (Hartree) | HOMO      | LUMO    |
|------|--------------|---------------|----------|------------------------------|----------------------------|-----------|---------|
| 1    | alginate     | DFT(b3lyp-d3) | 6-31g**  | 498                          | -2054.658                  | -0.227401 | -0.0345 |
| 2    | chitosan     | DFT(b3lyp-d3) | 6-31g**  | 2075                         | -5622.280                  | -0.217256 | -0.0108 |
| 3    | cyclodextrin | DFT(b3lyp-d3) | 6-31g**  | 1290                         | -3664.432                  | -0.200809 | 0.0308  |
| 4    | dextran      | DFT(b3lyp-d3) | 6-31g**  | 670                          | -1908.615                  | -0.220565 | -0.0232 |
| 5    | pectin       | DFT(b3lyp-d3) | 6-31g**  | 245                          | -761.199                   | -0.237331 | -0.0066 |
